# Supplementary material for: Individual characteristics, including olfactory efficiency, age, body mass index, smoking and the sex hormones status, and food preferences of women in Poland
Source: PeerJ. 2022 Jun 15;10:e13538. doi: 10.7717/peerj.13538 (PMC9206430; doi:10.7717/peerj.13538)
Supplement: Supplemental Information 5 [file peerj-10-13538-s005.xlsx]

## Sheet: Food preferences
Subject's number	Sex 1-woman 2-man	BMI	Age (years)	Do you smoke 1-yes, 2-no	Did you smoke cigarettes 1-yes, 2-no	Years of smoking	Number of cigarettes smoked per day	Number of cigarette packs smoked per day	Increased tobacco addiction (packet years)	Menopause 1-yes, 2-no	Hormonal contraception 1-yes, 2-no	1- Menopause 2-Hormonal contraception, 3- f. follicular, 4-f. ovulatory, 5- f.luteal	n-butanol dilutions	Odours. The number of correct answers.	1. Fish dishes	2. Egg dishes	3. Sweet desserts	4. Chocolate	5. Candies and jellybeans	6. Crisps	8. Dumplings	9. Pasta	10. Milk soup	11. Milk drinks	12. Cheese	13. Vegetables and salads,	14. Fruit	15. Sausages and ham	16. Beef and pork	17. Poultry	18. Bread	19. Fast food	20. Salty products	21. Sour products	22. Broth	23. Soups	24. Spicy dishes	25. Seafood
14	1	24.6097	51	1	1	33	3	0.15	4.95	1	2	1	0	5	8	7.7	7.7	7.6	7.5	8	8	8.1	2.3	8.2	8.5	2.2	8.3	2.1	7.3	7	8.6	8.5	3.1	3.5	9.1	9.1	5.5	0.3
291	1	18.3594	23	2	2	0	0			2	1	2	0	4	6.3	5.5	10	10	10	8.5	5.5	7	1	7	7.5	4	9	6	2	9	8	7.5	10	3	9	6	1	0
25	1	22.2656	50	1	1	32	2	0.1	3.2	1	2	1	0	3	10	10	10	10	10	10	10	10	1	10	10	10	4	7.1	4.5	10	10	5	3.9	6.9	10	8.7	2.3	4.7
150	1	19.7232	26	2	2	0	0			2	2	5	4	5	0	6	10	0.8	1.7	9	6.1	5.1	0	8.2	0.9	9.2	9.3	0	0	0	5	0	5.7	0	0	1.5	7	0
17	1	19.3337	24	2	2	0	0			2	2	5	4	4	4.7	7.9	9.3	8.8	2.2	1.3	7.9	6.8	5.7	6.7	6.2	8.5	9	3.7	2.7	7	7.3	4.3	0.8	2	2.3	1.5	4	0
51	1	24.2187	23	2	1	3	6	0.3	0.9	2	2		4	5	4.8	10	10	10	10	10	10	10	3	3.2	10	8.8	10	0.6	0	0.5	10	6.2	0	10	0	7.5	1	6
26	1	32.2708	28	1	1	14	10	0.5	7	2	2	3	8	3	7	10	10	7.2	8.3	10	10	10	5.2	7.8	10	10	5.5	4.5	2.3	4	7.1	10	10	5	7.5	6.4	1.7	4.6
117	1	30.7958	66	2	2	0	0			1	2	1	16	4	10	10	10	10	0	0	10	10	0	10		10	10	10	10	10	10	0	0	10	10	10	0	0
206	1	24.0882	24	2	2	0	0			2	2	3	32	3	2.5	1.1	10	10	8	10	9.1	3.7	3	1.5	1.8	4.6	9.4	10	8.7	10	10	8.3	10	4.5	8.3	4.1	8.1	2.3
65	1	25.2363	23	2	2	0	0			2	1	2	32	4	1.5	5.1	8	10	3	8.3	8.6	8.9	0.8	7.3	8.5	9	10	9.2	6.8	10	8.5	8.6	9	6	6.5	5.2	8	2
13	1	31.2213	28	1	1	7	8	0.4	2.8	2	1	2	32	5	5	3.2	7.8	8.4	9.3	7.7	5.8	4.9	1.1	7	8.9	9.2	9.3	8.5	8.3	8.8	7	5	4	8	10	10	1.1	0
32	1	29.0174	62	2	2	0	0			1	2	1	32	3	10	10	10	10	5.8	0	10	3.2	4.8	10	7.6	10	10	2.8	1.4	2.8	10	0	0	10	10	10	7.6	0
46	1	25.7778	50	2	1	24	50	2.5	60	1	2	1	32	2	1	3	10	8	2.2	3.3	7.6	1.6	5.8	9.5	10	9.5	8	2.4	6	8.2	4	0.4	0.1	4.2	10	5.5	0	0
280	1	34.5758	72	2	2	0	0			1	2	1	64	2	9.5	9	9	9	9.5	0	9	9.5	8	9.3	9.5	9.2	9.2	9	8.5	9	9.5	1.5	1.5	2	2	2	3.5	8.5
202	1	31.25	71	2	2	0	0			1	2	1	64	3	0	5.7	10	2.6	5	2.2	10	7.9	7.8	7.8	7.8	10	10	10	0	6.3	7.7	3.7	1.8	5.9	1.8	5.3	0	0
31	1	33.9844	59	2	2	0	0			1	2	1	64	4	10	7.1	10	10	4.7	0	7.3	4.6	10	10	10	10	10	6.1	6.1	10	4.8	0	0	10	4.8	6.7	0	10
228	1	19.1953	21	2	2	0	0			2	2	4	128	4	8	8	5.2	7.1	5.2	7.6	8.3	8.5	2.6	10	8.1	9.9	10	2.3	7.6	7.8	7.8	5.6	3.6	5.2	7.1	5.1	2.6	0.1
54	1	22.9854	23	2	2	0	0			2	2	3	128	5	10	10	6.2	2.8	5.2	3	7.8	4	0.5	5.2	5.2	9	10	1.5	0	1.4	5	1.5	9.2	9	0	9	6.5	0
158	1	20.7157	23	2	2	0	0			2	2	5	128	5	8.8	9	9	2.5	2.1	6.1	4.5	4	6.3	5.5	6.7	8	7.7	4.4	3.6	6	5.9	6.5	4.6	3.6	8.4	6.1	2.6	2.1
20	1	21.0077	24	2	1	1	5	0.25	0.25	2	2	3	128	4	3.3	7.7	10	9	6.1	9	10	10	10	10	10	10	10	7	2.4	10	10	3.2	7.8	8	2.8	10	2.7	5
148	1	21.1389	23	2	2	0	0			2	2	3	128	3	5	9	10	10	10	7	10	9	4	10	3	7	10	8	1	9	10	3	4	9	6	8	5	0
207	1	22.1367	23	2	1	3	0	0	0	2	2	3	128	5	9	9	9.5	9.6	8.9	8.9	9.3	10	1.2	9.5	9.8	10	8.8	10	7.1	10	10	1.8	7.3	10	10	9.2	7.6	9
175	1	21.6333	21	2	2	0	0			2	2	5	128	5	5.4	10	10	10		10	10	8.3	8.4	8.8	9.1	10	7.7	8.9	9.3	9.2	8.2	10	8.2	9.3	0.9	1.2	4.8	5
109	1	34.6627	55	2	1	13	5	0.25	3.25	1	2	1	128	4	10	10	10	10	10	8	1	5	0	2	5	8	10	10	10	10	3	6	5	10	1	9	8	2
197	1	22.2137	23	2	1	1	1	0.05	0.05	2	2	5	128	5	8.3	2.9	8.1	8.3	8.2	8.4	4.7	7.7	9.5	8.2	9.3	9.2	9.3	8.5	9	8.7	5.1	3.3	4.5	6.2	2.2	2.3	7.8	2.2
2	1	21.3382	23	2	2	0	0			2	2	3	128	4	4.9	2.8	8.9	8.6	4.8	3.3	4.7	2.9	2.9	4.6	4.4	10	10	4.6	5.5	5.5	6.2	2.2	2	5.3	5.1	6.4	5.4	1.1
307	1	24.8358	57	2	2	0	0			1	2	1	128	1	9	4.8	9	3	0.8	0.8	7	7.5	0.5	4.5	6.5	8.5	10	3.5	8.5	7	8.5	0.3	0.3	5.2	8.4	8.5	0.3	1.8
96	1	20.2812	23	2	2	0	0			2	2	5	128	5	5.2	5	10	10	10	2.5	3	3	2	2.7	3.9	9.6	10	2.1	0	0.8	10	0	8.5	3.8	1.7	4.8	6.6	0.4
278	1	30.116	61	2	2	0	0			1	2	1	128	2	7	8	2.5	2.5	2	0.5	3.5	6	0.3	4	7	8	8	6.5	5.5	6	5.5	0.2	0.5	4.5	0.5	1.5	1.5	2
193	1	21.2585	24	2	2	0	0			2	2	3	128	5	6.3	5.6	10	8	5.1	4	4.9	4	2.8	8.5	2.2	9.1	10	6.8	6.7	6.7	10	4.7	4.7	1.3	9.3	8.2	1.2	2.6
70	1	21.4533	25	2	2	0	0			2	2	3	256	3	5	9.2	3.4	2.8	3	1	2.2	4.3	3.5	3.5	6.8	8.7	9	4.7	4.2	5.2	8.3	8.3	4.3	1.2	8.8	2.7	8.8	9.5
115	1	25.5354	23	2	2	0	0			2	2	4	256	4	9.4	9.2	6.7	5.9	5.4	7.7	1.9	8.2	1.9	9.5	10	10	10	6.3	1.1	8.4	6.6	9.1	7	1.6	0	10	9.3	6.6
159	1	20.7031	23	2	2	0	0			2	1	2	256	4	6.2	7.7	10	10	7.6	7.5	8.1	7.4	5.2	5	6.4	7.4	10	7.1	7.3	7.5	7.1	5	6.1	4.8	9.4	9.4	3.7	3.8
165	1	19.5312	23	2	2	0	0			2	2	3	256	5	4.9	6.7	8.4	8.6	8.7	6.2	5.7	2.8	2.4	7.4	5.1	1.7	6.7	5.9	2.9	3	3.8	7.5	7.5	2.6	5.9	6.3	3.5	3.2
111	1	20.5457	23	2	2	0	0			2	2	5	256	4	10	8	4.8	10	10	6.8	10	10	10	4.2	10	10	10	5	10	10	10	10	8.1	8.1	10	10	5.1	0
123	1	16.6525	23	2	2	0	0			2	1	2	256	5	8.6	8.7	10	10	10	7.8	9	5.6	7	7.5	7.5	5.4	8	8.8	7.7	10	7.2	6	7.3	8.5	5.4	2	7.1	0
303	1	28.257	52	2	2	0	0			1	2	1	256	3	10	10	10	10	7	0.2	7.2	7	4	5	6.2	5.5	6	3.2	10	8.2	8.5	0.3	1.2	8.8	10	10	3	0.5
191	1	22.0386	25	2	2	0	0			2	2		256	4	5	7.7	8.9	8.5	9.1	8.8	4.9	6.9	2.8	3.6	7.3	8.9	8.3	7.1	5.2	7.6	3	6.4	6.9	6.7	5.3	7.2	9	8
19	1	16.937	24	2	2	0	0			2	2	5	256	2	3.3	2.3	7	7.1	6.6	5.6	9	8.5	1.4	8.6	8.9	9.6	10	0.6	0	7.3	9.6	0	1.5	10	10	10	10	0.4
55	1	20.9042	24	2	2	0	0			2	2	4	256	5	7.4	4.2	9.3	9	4.8	2.5	4.7	1.8	4	9.5	9	10	10	4	1.2	4.2	5.2	1	7.7	7.8	1.3	3.5	1.5	0.2
198	1	19.0311	23	2	2	0	0			2	2	3	256	4	7.7	8.6	9.3	3.6	8.2	5.3	8	9	1.6	3	5.3	8.4	8.3	6.7	4.6	6.4	6.1	5.5	5.6	7.7	5.2	6.5	4.7	2
18	1	22.213	24	2	2	0	0			2	2	4	256	5	2.7	6.6	9.2	10	6	8	7.8	9.2	3.7	5	7	10	10	3	5.9	8.3	9	7	2.5	8	5.9	7.5	8.8	0.8
113	1	19.3337	23	2	2	0	0			2	2	3	256	5	5.4	8.2	3.6	2.6	3.8	4.3	6.2	1.8	0	4.9	4.1	6.8	7.6	7.5	2.8	6.9	5.1	7.7	6.6	10	10	7.6	4.7	2.7
271	1	21.7993	20	2	2	0	0			2	2	3	256	3	0.3	9.3	10	9.8	7.8	8	9.5	4.3	4.3	1.7	1.8	4.5	7.5	2	0	2.5	5	8	2	2	3	6.5	6	0
209	1	22.5306	25	2	2	0	0			2	2	5	256	5	6.6	9.6	10	7.9	5.8	5	8.7	9.1	1.2	3	8	9.4	9.5	8.4	5.4	9.7	7.9	4.8	4.4	3.1	9.5	9.6	9.5	7.4
6	1	21.3382	21	2	2	0	0			2	2	3	256	4	5.1	8	10	10	10	6.8	10	10	0	10	3.3	10	10	7.2	10	10	10	8.5	6	4.9	10	1.4	5.4	0
200	1	21.4692	23	2	2	2	0			2	1	2	256	5	5.5	9	10	9.2	6.8	4.8	9.3	7.7	2.7	2.4	2.1	1	9.8	9.2	8.3	6.7	6	9.4	1.1	2.6	6.1	0.8	7	2.7
182	1	21.8871	24	1	1	4	3	0.15	0.6	2	2	3	256	5	8.3	10	10	10	10	4.9	10	10	2.3	9.1	8.9	8.8	10	4.9	3.9	6.8	7.3	8.5	2.7	3.6	2.2	7.5	8.9	4.8
287	1	18.2183	40	2	2	0	0			2	2	5	256	4	5.5	8	10	10	10	1.8	6	10	1.8	6.8	6.8	10	10	7.5	7.5	10	9.5	1.5	3	2.5	10	7.5	2.5	2.5
195	1	17.2111	23	1	1	6	10	0.5	3	2	2		256	4	9	9	5.4	3.5	2.9	1.8	7.6	7.8	3.8	3.9	2.9	7.6	6.4	10	8	9.1	8.8	10	7	8.8	9.7	8.8	7.8	2.1
231	1	20.8117	21	2	2	0	0			2	2	5	256	4	10	10	10	10	10	6.8	10	10	0.9	10	10	10	10	5.8	6.1	10	10	8.2	8.2	8.4	2.1	10	8.6	8.6
91	1	20.3125	19	2	2	0	0			2	2	3	256	3	5.5	9.8	9.8	9.8	9.8	6.8	9	8.3	10	8.1	1.7	8.8	9.4	8	8.4	8.1	8.5	3.9	10	10	9.5	3.2	3.8	5.3
157	1	19.2672	23	2	2	0	0			2	1	2	256	5	6.6	0.5	7.5	6.5	6.3	1	1.1	8	0.5	0.9	7	7.5	5.4	4.4	7.2	7.8	7	4.7	1.9	0.7	3.3	0.7	2.3	5.2
199	1	19.8413	23	2	2	0	0			2	2	3	256	5	5.2	3.5	10	9.3	9.5	3.7	5.3	5.4	3.7	5	2.9	6.4	10	2.5	1.2	6.1	6.1	4.8	3.8	1	1.1	2.4	0.7	0.6
22	1	21.2183	51	1	1	25	10	0.5	12.5	1	2	1	256	3	10	9.4	0.2	0.3	0	0.7	3.1	9.5	0.2	7	9.4	10	10	0.8	9.6	9.5	2.9	0.4	4.1	7.5	8.6	7.3	5.1	0.2
154	1	20.1951	28	2	2	0	0			2	2	3	512	4	10	10	10	10	10	3.5	10	10	3	4.9	5	10	10	0.7	7	9.5	8.8	1.8	3.4	7	10	10	5.8	8.5
58	1	17.5697	23	2	2	0	0			2	2	4	512	5	5.6	7.5	7.5	7.3	8.7	7.1	10	10	1.8	8.2	10	8.8	10	8.2	5.5	7.4	2.7	5.3	7	8.8	5.4	7.6	9.2	1.8
293	1	23.8281	75	2	2	0	0			2	2		512	2	10	10	0	5	0	0	4	2	4	6.5	5	10	10	3.5	7.5	10	5.5	0	0	10	10	10	5.5	0
281	1	30.4832	23	1	1	7	3	0.15	1.05	2	1	2	512	4	9	2	2.5	10	0	7.5	0	5	0	0	7	8.5	10	10	10	7	5.2	1.2	2	6	7.5	5.3	0	10
67	1	20.0773	23	2	2	0	0			2	2	5	512	4	9.9	10	9.8	8	6.5	6.3	7.7	9.6	6.5	6.5	7.5	9.6	9.8	6	5	9.7	4.8	7.4	4.8	5	9.5	9.6	10	10
217	1	24.6355	55	2	2	0	0			1	2	1	512	2	3.8	5.3	10	9.9	9.8	5.7	8	7	8.2	8.2	6.8	9.8	9.9	8.9	6.8	8.4	8.5	0.1	8.2	9.6	9.9	9.9	5.5	0.1
243	1	18.3594	23	1	1	7	3	0.15	1.05	2	1	2	512	3	8.6	8.6	4.9	4.8	4.9	7.1	10	0.9	2.9	5.1	8.4	10	8.8	10	8.1	5.5	8.7	8.7	10	8.7	10	7.6	0	8.8
279	1	31.0446	53	2	2	0	0			1	2	1	512	4	9.8	9.5	9.5	9.5	1	1	5.5	2	1.5	5.5	8	7.8	8	9	6	9.5	8.5	0.8	2	5.5	9.5	5.5	5	5.5
234	1	19.5312	23	2	2	0	0			2	1	2	512	1	6.3	3.6	9.9	9.7	10	10	8.4	8.6	3.6	7.2	2.6	8.5	10	5.6	8.4	8.7	7.6	9.5	3.8	3.9	7.9	8.9	3.7	1.1
56	1	32.872	35	2	2	0	0			2	2	5	512	1	1.2	0.5	9.3	10	7	5	7	5.2	0	1.5	1.5	1.5	8.8	1.3	1.3	3.3	5.8	5.8	7.5	0.3	0.6	4	0	0
101	1	22.0522	23	2	2	0	0			2	2	3	512	5	7.3	3.3	2.6	2.8	2.5	4.9	3.7	7.6	8.4	7	10	10	6.7	4.9	1.5	7	4.9	0	5	5	2	7.7	7.7	7.3
35	1	27.6817	44	2	2	0	0			2	2	5	512	5	5	1.6	10	8.1	5.2	1.3	5.5	2.4	5.4	8.5	3.4	5.4	10	5.3	3.6	4.9	7	0	0.8	1.1	5.2	4.1	5.2	2.3
8	1	26.6728	52	2	2	0	0			2	2	3	512	4	4.7	7.8	10	10	10	6.9	10	10	7.1	7.5	7.5	10	10	8	8	7.8	10	6.8	6.6	4.8	10	7	7	8.1
124	1	16.7062	23	2	2	0	0			2	2	5	512	5	10	6.4	4.7	4.8	3.7	4.8	6.8	8.1	5.1	2.5	4.5	6.4	6.3	7.5	7.5	10	7.7	4.7	2.4	5.5	10	5.6	6.5	6.7
57	1	19.0311	24	2	1	1	3	0.15	0.15	2	2		512	5	4.6	3.5	10	10	10	6.5	4.8	5.7	0	8.5	6	10	10	8	4.3	10	6	3.2	3.2	3.2	7	7	7	0
136	1	20.202	23	1	1	5	10	0.5	2.5	2	2	3	512	5	6.3	7	10	10	7	9.5	8.6	5.1	0.2	7.7	2	4	5.3	0.4	1.9	7.8	8.6	9.4	3.4	2	8.2	8.4	2.4	0
135	1	20.8209	25	1	1	5	3	0.15	0.75	2	2	5	512	5	5.6	1.8	6.5	6.6	2.9	5.6	9.6	7.8	4	6.2	9.7	10	9.5	8.2	7	10	8.4	8.2	4.4	6.4	2.2	6.6	10	9.5
50	1	28.3447	48	2	2	0	0			2	2	3	512	5	10	10	10	10	10	9	10	10	8.8	7.8	8.2	10	10	10	10	10	10	10	10	10	10	8.6	8.8	0
76	1	17.9982	23	2	2	0	0			2	2	4	1024	4	9.3	6	5	9	3.8	1.2	1.4	8.2	3.7	8.1	9.8	10	10	4.8	4.8	6.2	7	4.3	4.1	6.8	0.3	5	8.5	0
95	1	19.4674	22	2	1	4	3	0.15	0.6	2	2	5	1024	5	0	7.2	10	10	10	8.4	8.3	10	1.5	1.9	6.8	9.2	10	3	2.8	8.6	10	7.7	7.8	5.1	10	10	3.9	0
286	1	18.3391	18	2	2	0	0			2	2		1024	5	0	3.5	7.8	8.5	8.5	7.5	6	6	0	3.5	5.5	8.5	10	5	8	4.5	5	3.5	6.5	3.5	5.5	4.3	5.5	1
92	1	21.5139	20	2	2	0	0			2	1	2	1024	5	2.3	7.1	9	10	10	1.3	6.8	8	8.9	10	10	10	10	7	0.5	8.9	8.5	2.2	0.6	2.9	6	8.5	9.3	8.4
103	1	28.3447	26	2	2	0	0			2	2	3	1024	5	8	9	2.5	8.3	0.7	9	10	10	0	6	10	10	6.8	10	10	8.9	10	10	6.6	6.4	7.1	6.5	9.2	6.2
288	1	20.0692	40	2	2	0	0			2	2	3	1024	4	10	1	9	5.3	5.5	3	8.5	2	10	9	0	5	10	5	8.5	6.5	9.5	7.5	3.5	2	10	6.5	8.5	1.5
52	1	22.2908	23	2	2	0	0			2	1	2	1024	2	1.3	8	9	9	9	7.5	8.5	3.7	7	6.8	7	7	8.5	5	5	8	5.8	3	3	3	2	3.4	0.2	0
77	1	21.7193	21	2	1	3	5	0.25	0.75	2	2	3	1024	3	3	6.6	7.6	10	10	10	7.8	8	2	5.2	5.2	5.4	8.4	8.1	2.4	7.9	7.8	5.5	8.5	4	0.3	0.4	0.5	2.5
105	1	21.1927	29	2	2	0	0			2	1	2	1024	4	9.6	5	6	10	4	0.6	10	10	0	8.8	9.7	10	10	9	0.5	9.3	10	10	7.5	0.6	5.4	5.2	9.4	8
41	1	21.2953	23	2	2	0	0			2	2	3	1024	3	10	6	1.6	0	1	2.2	10	7.2	10	10	10	10	10	1.2	1.8	5.5	6.2	2.5	10	10	5	10	4.6	4.8
156	1	20.9366	23	2	2	0	0			2	2	4	1024	5	8.4	6.5	10	8.8	2	7.2	2	5	0	2.7	2.6	8.1	10	4.3	5.5	7	1.9	5.5	1	2.6	10	5	3	1.5
36	1	18.6453	23	2	2	0	0			2	2	3	1024	5	5	7	10	10	3.2	1.9	7.5	1	3	5.1	6.3	10	10	8.9	10	10	9.1	9.2	2.2	5.1	9.2	9.3	6.3	0
277	1	24.4141	47	1	1	25	5	0.25	6.25	1	1	2	1024	4	6.5	6.5	5.5	1.5	0.8	2.8	4.5	2.5	2.5	2	4	5.5	7	3	4.5	4	2	2.5	2	7	4	4.5	6.5	7
142	1	23.6244	50	2	2	0	0			2	2		1024	1	10	4.7	10	1.6	7	0	3.5	4	1	3.2	4.5	10	10	4.4	7.5	5	4.3	0	4.2	4.7	7.5	5	3.3	1.2
134	1	18.7783	23	2	2	0	0			2	2	4	1024	4	7.6	8.7	10	10	10	8.6	5.4	10	2	2.2	7.7	7.5	9	7.3	6.6	8.5	8.5	9.2	5.3	10	0.7	2	9.3	4.7
10	1	36.7309	29	2	2	0	0			2	2	5	1024	5	4.7	1.3	0.8	0.9	0.5	0.5	0.8	4.9	0.6	4.6	4.9	7.8	8.1	4.9	5	2	4.8	1.9	3.2	2.8	5	5	2.3	0.8
294	1	27.8852	73	2	2	0	0			2	2		1024	4	8	8.5	9.5	9	6.5	0	10	9	9	9	10	10	10	3.5	7	10	10	0	5.5	10	10	10	0	5.5
12	1	21.7993	21	2	2	0	0			2	2	5	1024	5	5.9	4.7	7.9	8	4.4	1.5	4.6	5.6	2.3	5.9	5.9	6.6	7.1	5.2	4.6	6.2	5.9	5.3	1.5	8.5	0	4.2	7.8	1.5
116	1	22.1367	23	2	2	0	0			2	2		1024	5	5.3	10	1.9	9.4	1.8	10	2.8	10	1.9	9.6	10	9.3	10	6.6	4.1	6.5	8.8	10	6.9	8.6	9.2	10	4	9.6
66	1	22.1453	23	2	2	0	0			2	1	2	1024	3	8	8	9.5	9.5	8	3.8	8.8	8.6	4.7	8.8	8.7	8.6	8.6	8.7	8.7	8.6	8.5	6	4	5.5	5.2	7	2	2
53	1	23.3067	23	2	2	0	0			2	1	2	1024	4	5	10	9.2	5.2	2.4	2.4	1	10	0	2.2	2	7	8.5	10	7.7	9	8.8	10	9	5.2	10	8.8	8	10
49	1	24.6094	24	2	2	0	0			2	1	2	1024	4	10	10	10	10	7	5.3	8	6	10	7.2	7	10	10	10	10	10	10	7	7	8.6	5.2	6	3.8	1.2
248	1	19.1406	23	2	2	0	0			2	2	5	1024	5	8.4	9.4	10	10	4.7	8.9	7.1	7.8	3.4	6.4	3	8.7	10	8.7	9	6.5	8.5	6.5	8.4	2.5	7	6.8	0	0
244	1	22.0386	24	2	1	1	1	0.05	0.05	2	1	2	1024	5	7.1	2.4	8.7	9.8	5.3	6.5	4.8	7	8.1	4.8	6.3	5.8	8.8	5.6	5	8	5.5	6.6	5.8	1.2	5	5.3	1.6	1.2
264	1	32.872	53	1	1	23	10	0.5	11.5	1	2	1	1024	5	10	10	10	10	8.5	5.5	4.5	5.5	1.5	4.5	6.5	8	8.5	6	7.5	9	5.5	2.5	4	6.5	6.5	6.5	5.5	1
3	1	24.0346	36	2	2	0	0			2	1	2	1024	5	3.4	1.5	3.6	5.7	0.5	0.5	3.9	5.3	8.1	5.2	6.3	7.6	7.7	6.1	7.2	6.8	2.9	1.3	0.4	8.5	9.1	9.1	6	2.9
251	1	19.8352	23	2	2	0	0			2	2	5	1024	5	4.7	8.1	10	6.8	8	8.5	5.9	6	3.6	5.3	6.3	7.2	7.8	5.4	5.6	6.5	5.5	5.4	5.7	5.3	8.3	8.3	5.9	3.6
43	1	20.9042	22	2	2	0	0			2	2	3	1024	4	7.5	5	10	9.7	9.7	7.4	7.2	9.5	4.8	5.7	6	6.5	6.5	7.5	6.5	7	7.5	1.2	1	0.8	4.2	4.4	0	2.5
186	1	19.3772	22	2	2	0	0			2	1	2	2048	5	8.7	5.2	10	8.5	10	10	7.1	8	5.2	10	8.8	10	10	10	6.7	9.1	10	8.8	8.8	8.9	10	10	9.1	4.4
247	1	20.4783	23	2	2	0	0			2	2	5	2048	3	6.4	4.8	8.7	8.8	6.8	9.1	7.7	8.3	0.9	8.5	8.8	8.7	8.8	7.5	7.3	9.3	6.4	8.5	8.5	9.4	9.4	9.5	9.8	7.2
62	1	22.8571	22	2	2	0	0			2	2	3	2048	5	7	8	10	10	10	10	7.6	9	0	5.7	8.5	4	7.8	8	9	4.5	4.5	7.8	10	10	1.4	8.5	3.5	1.5
5	1	31.2394	22	2	1	1	4	0.2	0.2	2	2	3	2048	3	10	7.8	10	8.7	10	10	10	7.1	0.7	10	10	10	10	6.5	10	10	10	10	10	10	8	6.8	10	10
306	1	20.4382	37	2	2	0	0			2	2	5	2048	2	8.8	9	10	10	10	4.8	8	7.5	0	7	8.5	10	10	5	4.5	7.5	8.2	6.3	6.3	7.8	10	8.2	4	5
177	1	18.8189	22	2	2	0	0			2	2	5	2048	5	10	10	5.8	7.9	5.3	8.6	3.5	8.3	1.5	4.6	10	4.7	10	8.4	4.1	10	3	7.9	5.6	10	2.3	5	10	2.1
163	1	18.4265	23	1	1	5	1	0.05	0.25	2	1	2	2048	5	10	10	10	10	10	10	10	10	1.6	10	10	10	10	10	10	9	10	10	2	8.6	5.4	10	0	0
93	1	21.5019	19	2	2	0	0			2	2	5	2048	4	6.2	6.5	8.3	8.8	7.5	6.4	7.5	6.5	7.3	7	6.8	7.1	8	6.4	5.8	6.5	6.8	7	5	6.1	9.3	7.4	4	0.5
249	1	20.7967	23	2	2	0	0			2	2	5	2048	5	8.8	4.8	7.3	4.8	7.5	8.6	5.9	6.2	2.4	5.2	1.2	6.1	8.7	8.9	8.7	7.4	6.1	8.5	6.5	8.7	2.1	6.3	6.4	1
161	1	22.3214	26	1	1	5	1	0.05	0.25	2	2	4	2048	4	10	9.2	8.5	0.5	0	0.2	4	10	1.7	9.3	10	10	10	0	0	0	0.2	1	0.2	9.5	0.2	1.2	10	10
300	1	20.3125	23	2	2	0	0			2	2	3	2048	4	8.5	6.5	9.5	8	6	6.5	7	7	7	7	5	7	8	4	6	6	6.5	5.5	6.5	6.5	7.5	7	4	4.5
1	1	20.83	23	2	2	0	0			2	2	5	2048	5	5.1	7.3	8.5	8.5	8.5	10	6.5	5.2	5.3	7.4	8.3	7.4	10	8.7	7.7	8.8	8.8	10	8.3	4.9	7.7	6.3	2.6	0
173	1	21.4844	24	1	1	8	5	0.25	2	2	1	2	2048	5	8.9	10	10	7.4	5.6	5	10	10	0.1	3.1	7.9	3.9	7.7	10	10	10	9.9	9.9	2.5	4	10	6.9	3.4	10
61	1	20.1956	23	2	2	0	0			2	2	5	2048	3	9	9	5.5	5.3	3	2.5	6	7.4	0.5	7.5	6.8	9	9	3.8	0.3	5	5	4.8	3	0.8	4.3	5.2	0.8	0.4
44	1	17.5771	23	2	1	3	20	1	3	2	2	5	2048	5	2.4	3.8	9	7.7	7.7	10	6.7	8.2	0	8	8	8.7	10	6.6	7	8.6	6.6	8	8.5	7.7	7.8	5.5	5	0
137	1	19.7232	23	2	2	0	0			2	1	2	2048	5	7.3	2.4	10	10	1	0.6	4.6	9.2	3.6	0.2	1.2	10	5.2	8.9	8.5	5.3	9.1	2.7	2.4	2.3	10	9.7	0	0
112	1	19.8352	24	2	2	0	0			2	2	3	2048	3	10	10	7.8	10	8.7	1.9	6.4	10	3.9	6.2	8.8	1.8	10	10	6.3	10	5	2.9	4.8	0.8	5.2	10	10	0
11	1	24.7409	23	1	1	4	5	0.25	1	2	2	4	2048	5	4.8	8.3	9.5	7.6	1.5	1	7.5	8.6	0.6	4.7	4.8	7.4	8.6	7.3	4.5	4.5	9	8.5	7	9.8	0.2	6	0.9	0.9
283	1	20.0692	23	2	2	0	0			2	2	3	2048	5	3.5	0.5	7	10	2.5	1.5	6.5	4	0	0.8	0	5	7	4	6	10	5	7	2	3.5	8.5	8	2.5	1.5
132	1	18.7783	23	2	2	0	0			2	2	5	2048	5	8	10	10	10	10	10	10	10	0	4	9	10	10	7	3	9	10	10	10	10	8	5	8	0
139	1	27.6817	23	2	1	6	4	0.2	1.2	2	2	5	2048	3	5	8.7	10	9.5	7.6	7	10	9	0.2	1.5	5	4	3.7	0.5	0	3.5	6.2	6	0.2	0.3	1.6	2.7	6.1	0.2
215	1	24.539	23	2	2	0	0			2	2	5	2048	2	7.4	8.4	10	10	2.1	4.6	6.2	8.6	4.9	3.2	5	10	10	5.3	5.4	5.6	7.9	7.9	6	3.8	3.8	6.8	3.6	0
246	1	22.2063	23	2	2	0	0			2	2	5	2048	4	2.6	8.5	10	10	10	8.8	10	10	3.1	9.2	10	10	8.7	5.7	6.5	9.3	5.5	8.8	5	5.2	7	7.4	3.6	0
233	1	21.3599	23	2	2	0	0			2	2	5	4096	3	10	6.3	10	10	9.2	4.1	7.9	6.6	2.5	5.3	3.2	5.8	10	6	3.4	6.4	6.2	2.1	2.1	2.1	5.6	5.5	2.5	3.6
64	1	18.1449	23	2	2	0	0			2	2	3	4096	3	6.8	7.8	10	10	10	10	5	9.3	0	9.2	9	10	10	0	0	2.2	10	7	10	2.5	0	0	5.2	0
155	1	22.3863	26	2	2	0	0			2	1	2	4096	5	9.2	10	10	10	10	10	10	10	9.5	10	9	9.5	10	10	10	10	8.7	10	9	10	10	10	9.2	9.5
174	1	20.4152	21	2	2	0	0			2	2	3	4096	3	10	6.6	8.3	7.9	6.8	4.6	3.1	4.7	4.4	5.6	2.6	7.3	7.3	4.4	3.9	7.6	3.8	4.5	2.7	1.4	1.2	1.6	6.3	0
190	1	24.8016	19	2	2	0	0			2	2	3	4096	4	4.4	9	10	2.9	0.4	0	6	6.4	7	10	7.2	10	10	3.3	0	2.6	10	0	0	0.7	4.2	5	0.8	1.1
222	1	20.0773	23	2	2	0	0			2	1	2	4096	3	8	7	7	8	5	6	5	7	3	5	6	8	8	7	8	8	6	7	6	3	9	9	7	5
255	1	20.3383	23	2	2	0	0			2	2	3	4096	5	9	9	10	9.5	9.5	5	7.4	8	7	7	8.3	9.5	9.5	5.5	2.7	7	6	2	1.5	3.2	5	4	7.5	7.8
188	1	21.3039	18	2	2	0	0			2	2	5	4096	5	5.5	8.2	9	9.5	9.7	9.6	10	8.6	3	6.1	10	8	10	7	5.4	8	8	6.2	4.4	6	6.9	9	6.5	4.2
138	1	22.7583	23	1	1	2	4	0.2	0.4	2	2	5	4096	3	10	6.7	10	10	4	5.4	6.4	3.4	0	1.3	5.2	8.1	8.1	2.7	5.9	6	8	8	3	5.5	3.6	3.5	1.7	6.5
208	1	20.0288	23	1	1	3	3	0.15	0.45	2	2	5	4096	3	2.4	8	9.8	9.8	8	9.6	9.6	9	0.5	8.2	8.8	9.8	9.8	5.4	4.6	9.6	9.1	5.1	4	5	3.7	9.3	9.7	1.4
250	1	20.9042	23	2	2	0	0			2	2	5	4096	4	7.5	4.6	7.6	9	1.1	2.4	4.8	7.7	0	1.7	4.8	10	4.9	8	8	8	6.2	6.4	0.9	4.7	8.7	8.6	8.5	0.9
63	1	22.3094	29	2	2	0	0			2	2	5	4096	0	7	6	5	7	3.8	9	8	6.4	6.5	8.5	8.5	10	10	10	10	10	7.8	7.6	5	7.5	8.7	10	0	0
160	1	17.6471	23	1	2	5	1	0.05	0.25	2	1	2	4096	4	6.4	10	10	10	10	9	10	10	5.7	10	10	8	10	8.5	8.5	8.7	10	10	7.4	4	4.2	4.2	2	3.3
272	1	32.2708	20	1	1	2	3	0.15	0.3	2	2	3	4096	5	5	6	6.2	7	7.2	7.5	7.5	5	7	4	6	7.3	7.3	4.5	6.3	5.3	5.3	7	3	6.3	3.3	4	6	4.2
102	1	20.2812	23	2	2	0	0			2	2	3	4096	5	5	2	8.6	2.6	4.8	1.2	2.6	2.4	2.2	4.3	3.4	8.4	9.2	2.5	5	5	5.2	2.2	1.4	4.3	0.4	4.5	1	1.1
73	1	21.2585	23	2	2	0	0			2	1	2	4096	4	8.7	7.8	6.7	6.6	3.3	7.1	6.1	10	0.9	7.8	9	10	9.7	8.1	7.8	8.4	8.2	1.1	6.9	7.8	8	9	9.6	8.1
114	1	23.7954	23	2	2	0	0			2	2	5	4096	4	7.4	5.4	10	10	7.7	8.4	10	5.1	4.2	6	7.9	7.9	9.6	8.5	10	10	8.6	10	6.7	8	10	10	6.7	0
121	1	20.3125	23	2	2	0	0			2	2	3	4096	4	8.4	4.3	8.1	5.6	5.7	4.1	7.2	4.7	5.1	5.3	3.3	8.1	8.9	7.6	5.4	6.3	5.3	6.9	7	7.2	6.9	7.8	8	1.2
241	1	19.3337	23	2	2	0	0			2	1	2	4096	1	0	0	8.5	8.4	5.4	10	0	7.7	0	0	5	9	10	1.2	4.7	0	7.4	5.7	2.4	5.1	8.2	0	5.2	0
184	1	17.301	25	2	2	0	0			2	2	3	4096	5	3.1	6.9	10	10	10	4.1	5.9	5.1	6.9	5.4	5.3	8.5	9.3	6.6	8.2	8.4	10	2.6	3.5	3.4	8.3	8.4	5	1
214	1	20.4491	23	2	2	0	0			2	2	4	4096	4	7.3	7.9	5.4	1.5	0	3	10	10	0	5	10	10	2	7.6	10	8.4	1.9	10	4.7	8.5	5	8.8	10	5.4
290	1	19.487	25	2	2	0	0			2	1	2	8192	3	5.5	5.8	9.2	9	9	3.5	4.8	6	6	6	7.5	7.5	7.5	5.5	5	5	5	2	2	2.5	2.5	5.5	5.5	1.5
297	1	21.0077	25	2	2	0	0			2	2	5	8192	5	5.5	9.5	10	8	7.5	6.5	7.5	5	0	0	0	8	10	0.5	0.8	2.5	6.5	8	7.7	4.2	4.2	6.2	0.2	0
84	1	21.2245	19	2	2	0	0			2	2	4	8192	5	3.5	4.8	10	10	10	2.2	5	2.3	3.3	3.4	2.2	4.3	4.6	5.3	1.8	3.9	3.2	3	3.8	2.7	3.7	1.8	1	1.3
133	1	26.7698	23	1	1	8	15	0.75	6	2	2	3	8192	5	6.4	3.9	6.6	3	1.7	2.9	4.6	6.8	1	7	8.6	10	10	8.2	10	7.2	4.8	6.3	5	0.6	1.9	4.2	8.2	6.8
33	1	16.7277	23	2	2	0	0			2	2	4	8192	5	10	10	7.3	1	2.1	9	8.8	8.2	9.6		9.5	10	10	10	9.2	10	9.3	9.3	10	10	8.1	9.7	10	0
299	1	18.2868	23	2	2	0	0			2	2	3	8192	4	4.5	7.5	8.8	8.5	8.5	6.5	6.8	7	5.5	7	5	7.5	9	3.5	2.5	3.8	7	5	6	6.5	3.5	6.5	1	3
253	1	23.8751	23	2	2	0	0			2	2	3	8192	4	4.5	6.3	10	10	10	4.7	6.3	8.3	0	5	2	7.5	8.5	9.5	9.8	9.8	5.5	2.8	4.8	1.8	3	4.5	7.2	1
256	1	31.2213	23	2	2	0	0			2	1	2	8192	5	2.7	1	6.5	6.3	6.3	8.3	10	10	3	5.2	9.4	0.5	4.9	4.8	3.9	7.9	7.8	9.8	8	7	9	7.5	8.5	0.5
292	1	21.9525	23	2	2	0	0			2	2	3	8192	4	6.5	9.5	8	5.5	5.5	2.5	5	6.5	1	7.5	6	10	10	4.5	8.5	10	8.5	3	0	3.5	10	6	7	6.5
181	1	22.7732	24	2	2	0	0			2	2	5	8192	5	10	10	10	10	10	7.2	5.4	9.3	10	10	9	10	10	10	10	10	9	10	4.4	10	10	8.7	4.8	10
152	1	19.4674	23	2	2	0	0			2	2	5	8192	5	6.2	9	10	10	6.5	8.8	10	10	4.8	5	5.4	6.2	10	9.1	10	10	10	7.7	8	2.9	2.2	7	8.5	4
282	1	35.6513	23	2	2	0	0			2	2	3	8192	3	4.8	2.3	10	7.3	4.3	8.3	0.5	3.5	0	4.8	5.8	6.8	8	1	5.5	3.5	4.5	2.3	1	6.5	10	4.5	6.3	0
24	1	24.1672	43	2	2	0	0			2	2	3	8192	5	9.3	9.3	9.8	4.1	7.9	2	4.4	4.9	0	5.5	6.9	9.8	9.8	5.8	6	5.4	3.3	0.5	2.4	6	3	3.8	0.7	2.8
295	1	20.9566	24	2	2	0	0			2	2	3	8192	3	5	2.5	3.5	3.5	1	4	1.5	7	0.3	1.3	6	3.8	2.2	8	7	6	2.5	8.5	6.5	7.5	4	1.5	8.5	10
59	1	17.1875	23	2	2	0	0			2	1	2	8192	5	9.5	7	10	10	10	5.2	9.5	8.5	0	0	0	7.7	9.5	9.2	5.6	7.5	8	0.5	5	6.4	7.2	8.5	8	5
39	1	20.0692	21	1	1	4	8	0.4	1.6	2	2	5	16384	5	1.2	4.4	9.2	10	10	10	7.1	5.7	2.1	6.9	7.2	6.9	9	8.8	5.5	7	7.1	10	6.3	10	10	9.5	6.8	0
296	1	20.2865	23	2	2	0	0			2	1	2	16384	3	4	6	9.5	5.5	3	4	5.5	6	0	0	10	10	10	6	2.5	9	7	0.5	2	4.8	1	5	2	0
254	1	17.4413	23	2	2	0	0			2	2	5	16384	5	2.5	4.5	10	10	10	8.5	10	10	0	0	3.5	5.3	7.8	6.5	5	4.5	8.5	8.5	8.5	7.2	6.8	8.5	2.8	5
69	1	24.3141	23	2	2	0	0			2	1	2	16384	3	6.5	10	8.5	2.8	0.8	0.5	6.2	7.5	3	5.5	3	5	4.7	1.2	0.5	6.5	5	0	0.8	6.7	5.8	6.7	0.4	0
298	1	23.5883	23	2	2	0	0			2	1	2	16384	2	3.5	4.5	1.5	1.5	3	5.5	8	9.5	0.5	4.5	7	6.5	8.5	5.5	5.5	5.5	7	10	8	8	2.5	1.5	6.5	8
192	1	19.8413	24	2	2	0	0			2	2	5	16384	4	8.8	10	10	10	6.7	10	5.5	9.3	3.9	7.4	9.8	10	10	9	7.7	10	10	9.8	9.8	10	10	10	10	1.1
42	1		23	2	2	0	0			2	2	5	16384	3	7.9	7.5	9	5.2	5.5	10	10	10	5.8	9	9.6	9.5	10	10	10	10	10	10	10	9.2	7.8	7.8	9.5	5
180	1	21.9525	24	2	2	0	0			2	2	5	16384	4	7.1	8.8	10	2.3	0	0.5	10	9.1	0	0.5	2.7	10	10	0	10	10	1.8	0	0	0	7.6	9.5	0.6	4.5
189	1	25.0762	24	2	2	0	0			2	2	3	16384	5	3.4	5.1	10	10	10	7.9	8.1	5.6	10	10	10	10	10	1	1.4	5.8	3.8	5.1	3.4	7.1	1.1	8	10	0
74	1	20.8611	24	2	2	0	0			2	1	2	16384	5	6.3	6.2	9.3	9.2	9	4.7	2.5	4.1	4.6	4.8	2.2	7.4	7.7	7.6	4.7	7.5	7.7	4.9	2.2	2	5	2.3	5.3	2.1
252	1	23.9	23	1	1	5	8	0.4	2	2	1	2	16384	4	1	0	10	10	10	8	1.4	5.3	0	0.5	0.8	3.5	6.5	6.8	6.8	6.8	7.7	10	8.5	8.5	8.5	8.8	9	0
213	1	18.2183	24	2	2	0	0			2	2	5	16384	4	4.7	6.4	10	10	8.3	8.2	10	7.9	0	0	3	3.4	10	5.1	0.5	6.4	8.3	6.4	8	7	8.8	8.7	4	0
72	1	18.8189	23	2	2	0	0			2	1	2	32768	5	5	8	10	10	10	10	10	10	0	10	10	10	10	7.2	8.5	8.7	10	10	8.9	10	10	10	8.2	0
23	1	19.0311	21	2	2	0	0			2	1	2	32768	4	5.2	7.6	7.6	7	7	7.9	10	10	6	7.8	5.5	10	10	10	10	10	7.5	10	7.8	8	10	10	7.5	0.8
221	1	20.5499	19	2	2	0	0			2	1	2	32768	2	3.2	4	9.8	9.9	9.9	7.8	5.1	8	0.5	3.4	8.2	3.8	9.1	8.9	8.9	10	10	5	3.4	2	9.7	1.6	6.4	3.7
86	1	23.1084	21	2	2	0	0			2	2		32768	5	4.8	7.5	10	10	7.3	1.8	7.1	6.7	2.3	9.5	9.2	10	10	2.4	4.7	6.8	5.6	3	1.3	9.4	10	5.1	9	0
258	1	17.9982	23	2	2	0	0			2	1	2	32768	5	0	2	8	8	9	4	3.9	6.9	1	0.8	2	3.7	7.4	1.4	1.4	3.8	5.7	3	2.7	1.5	4.8	4.8	0.5	0
268	1	20.7612	23	2	2	0	0			2	2	5	32768	4	1.5	7.2	10	10	10	10	10	8.5	10	10	10	9.3	10	1.8	0.8	4	7.5	0	10	10	7	3.5	2.5	0
263	1	28.8889	54	2	2	0	0			1	2	1	32768	5	6.5	5	7.5	8	7	4	4.5	4	0.3	1	3	7.5	8	5.3	5.1	6	5.2	1	3	3	9	8	2.2	0.8
275	1	21.9671	23	2	2	0	0			2	1	2	32768	5	0	9.5	9.5	9.3	9.5	7	6.5	9.5	0.5	4.5	9.3	9.3	9.3	9.3	2	1	9	0	0.5	8.8	5	7.7	0.5	0.3
140	1	19.9594	28	2	2	0	0			2	2	5	65536	4	8.5	0.5	9.8	7.4	6.5	3.2	3.5	7.8	10	1.5	2.1	10	10	9.1	8.9	8.2	5	3.2	4.7	6.5	10	10	0	0
203	1	23.8281	21	2	2	0	0			2	2	3	65536	4	3.5	10	10	10	8.2	5	4.8	6.3	2.6	5.6	2.2	2	5.4	4.2	2	3	7.7	4.3	5.1	3.6	5	5	0.7	0.1
274	1	30.2222	71	1	1	31	8	0.4	12.4	1	2	1	65536	4	8.5	6	7.8	2.7	4.8	0.2	6.5	9	9	6.5	7.2	6	6	5.4	3.8	7	6.5	0.3	0.3	6	8.5	6	0.3	3.4
269	1	25.0593	23	2	2	0	0			2	1	2	65536	5	4.8	6.2	7	7	1	7	8	8.8	1	5.3	8.5	7.5	7.5	6.5	7.5	8.5	7.5	8	8	6.5	6.3	7.3	8.5	5.6
257	1	18.3594	23	2	2	0	0			2	2	3	65536	5	5	5	5.7	5.7	5.7	8	5.2	6	0.5	5	6	7	7	8	9	7.3	5	9.5	9	8.3	2.5	4.5	0.2	9.2
196	1	24.2215	25	1	1	4	2	0.1	0.4	2	2	3	65536	4	6.9	6.9	9.8	10	5	5	6.4	2.6	8.6	10	10	10	10	4.7	6	8.7	9.5	8	8	9.8	7.8	9.8	10	0
71	1	23.7387	23	2	2	0	0			2	1	2	65536	5	8.5	6.2	10	10	10	10	7	8	0	7	6.6	8.3	10	7.5	7	8.3	7.5	8.5	7.5	10	0	5.5	7.2	0
162	1	19.6072	23	2	2	0	0			2	2	3	65536	5	8	8.2	5	5	4.8	10	10	10	0	10	10	10	10	5.2	10	10	10	10	10	10	10	10	10	10
88	1	25.9516	19	2	2	0	0			2	1	2	65536	4	6.5	5.3	9.2	8	3	8.5	7.2	9.1	1.2	5	7.5	9.2	9.2	9.2	2.9	9.2	6.4	10	9	7.7	7.8	9.2	7.6	5.3
87	1	19.3772	20	2	2	0	0			2	2	3	65636	5	9.4	6.8	9.8	10	2.5	3.3	9.4	3.6	3.6	8.3	7.1	10	3.3	2.4	8.8	8	10	8	7.8	9.3	10	7.2	8.5	10
